# Supplementary material for: Fifty-six years of surface solar radiation and sunshine duration over São Paulo, Brazil: 1961–2016
Source: Copernicus journal article supplement (doi:10.5194/acp-21-6593-2021), 2021-05-03
Supplement: Supplementary file 1 [file acp-21-6593-2021-supplement.pdf]

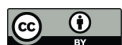

*Supplement of*

## **Fifty-six years of surface solar radiation and sunshine duration over São Paulo, Brazil: 1961–2016**

**Marcia Akemi Yamasoe et al.**

*Correspondence to:* Marcia Akemi Yamasoe ([marcia.yamasoe@iag.usp.br](mailto:marcia.yamasoe@iag.usp.br))

The copyright of individual parts of the supplement might differ from the article licence.

### Verification of the long-term calibration shift of the Actinograph

To evaluate the stability of the Actinograph used to measure surface solar irradiation (SSR) analysed in the manuscript, we compare a one-year of simultaneous measurements, conducted in 2014, with a brand new Robitzsch-Fuess Actinograph, type 58dc. Monthly scatterplots comparing irradiation data from daily measurements are available at [http://www.estacao.iag.usp.br/Relatorios/Relat\\_tecnico\\_3.pdf](http://www.estacao.iag.usp.br/Relatorios/Relat_tecnico_3.pdf) (in Portuguese – last access on 10 February, 2021). Figure S.1 presents the scatterplot of all daily measurements performed in 2014, comparing both instruments data, where SSR\_operational refers to irradiation measured by the instrument whose data is analysed in the manuscript and SSR\_new refers to irradiation measured by the new actinograph. Bars (vertical and horizontal) indicate the 5% instrumental uncertainty. Applying a least square fitting to the data, the resulting slope was  $0.919 \pm 0.006$ . We assume that the operational actinograph suffered a linear degradation throughout the years, from 1961 to 2014, and that, in the first year, the slope should be equal 1. Using such hypotheses, the difference in slope results in a long-term trend of about -1.5 % per decade, ranging from (-1.6 to -1.4) % per decade. Identical results were obtained by Plana-Fattori and Ceballos (1988), confirming the long-term stability of the instrument.

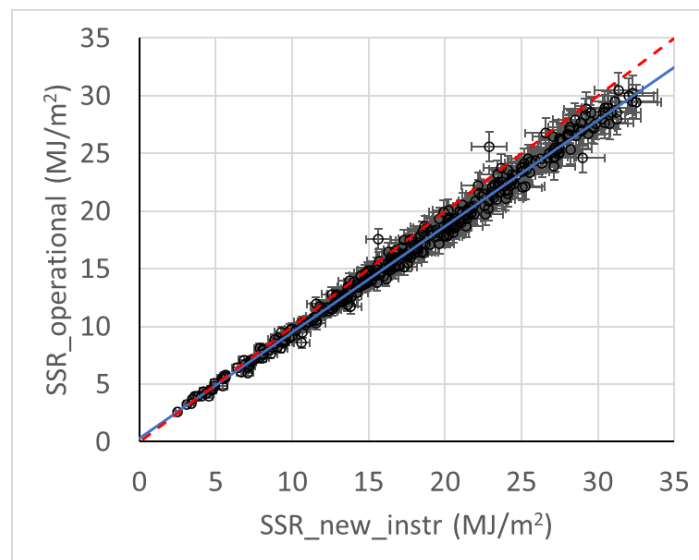

Figure S.1 – Comparison of one year of irradiation measurements performed with two Actinographs, the operational, whose data is discussed in the manuscript, and a brand

new one. The blue line represents the least square fit with coefficients: linear =  $0.30 \pm 0,07$  and slope =  $0.919 \pm 0.006$ . The red line is the 1:1.
